# Supplementary material for: Enzyme-mediated formulation of stable elliptical silver nanoparticles tested against clinical pathogens and MDR bacteria and development of antimicrobial surgical thread
Source: PubMed Central journal article supplement (PMC5434635; doi:10.1186/s12941-017-0216-y), 2017-05-16

## Additional Figure

UV-Vis spectra of AgNPs synthesized at (A) 37 °C (B) 60 °C (C) 80 °C and (D) 90 °C temperature and AgNPs biosynthesis confirmed over a period of 2 to 8 hours. Tube image indicated the color changed in the reaction mixture after 8 hours treatment at each specified temperature.

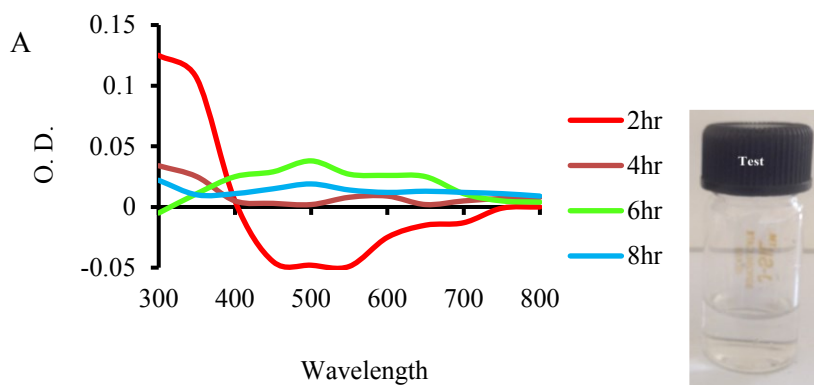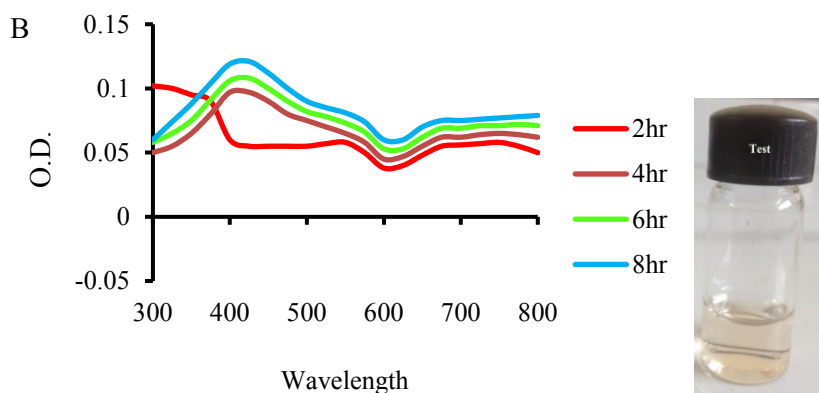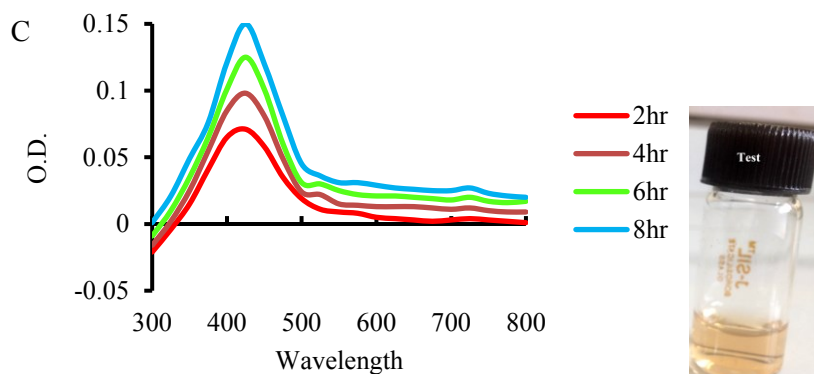

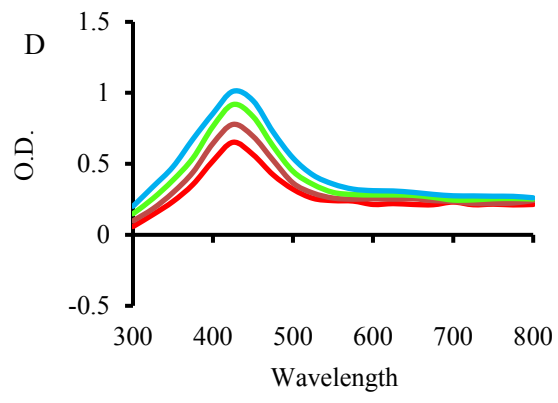

- 2hr
- 4hr
- 6hr
- 8hr

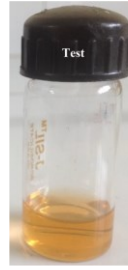

Supplement: 12941_2017_216_MOESM1_ESM.pdf [file 12941_2017_216_MOESM1_ESM.pdf]
